# Supplementary material for: Comprehensive Analysis of Major Latex-Like Protein Family Genes in Cucumber (Cucumis sativus L.) and Their Potential Roles in Phytophthora Blight Resistance
Source: MDPI journal article supplement (doi:10.3390/ijms24010784), 2023-01-02
Supplement: s1 [file s1]

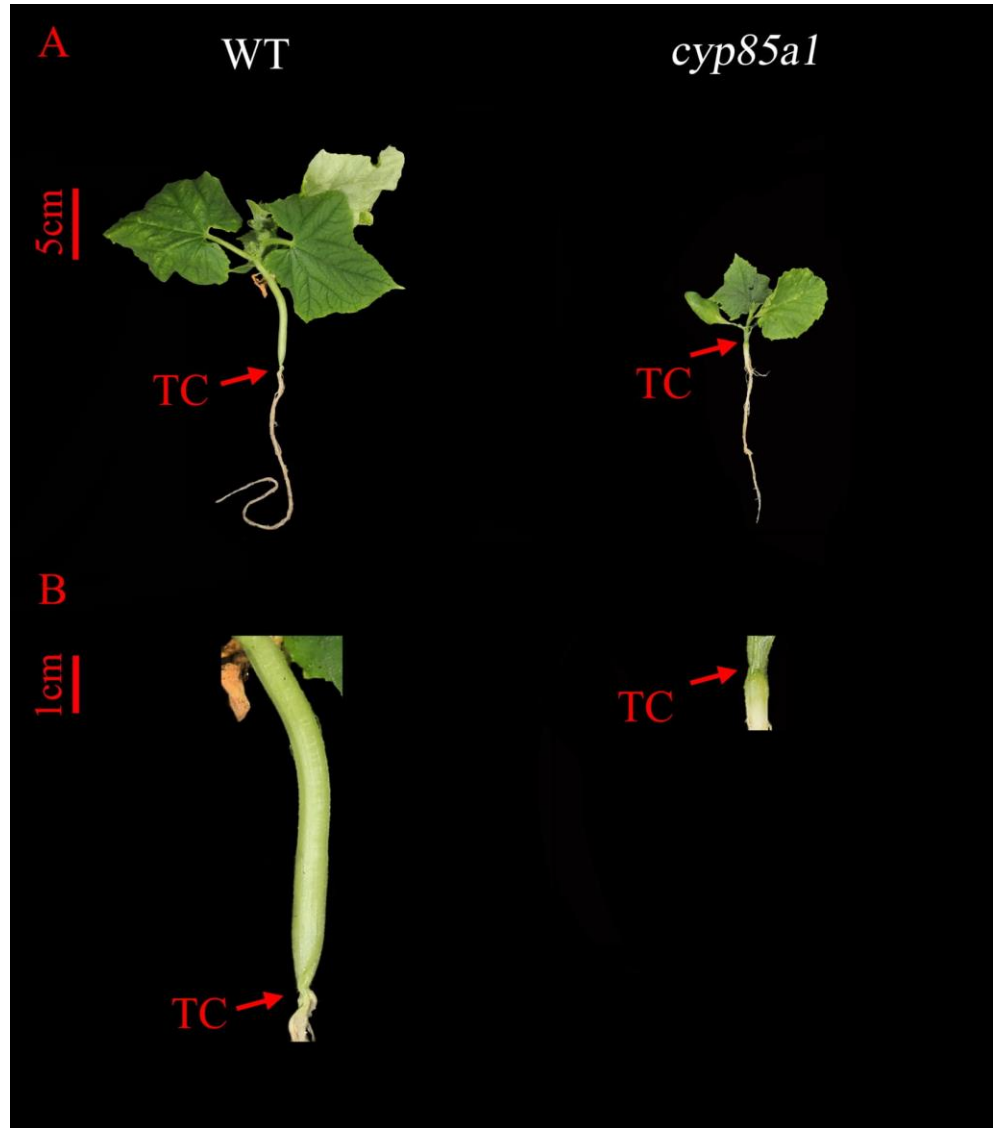

**Figure S1.** Phenotypes of *P. melonis* infected mutant *cyp85a1* and WT plants 72 h after inoculation. Abbreviations: TC, tissue collapse.

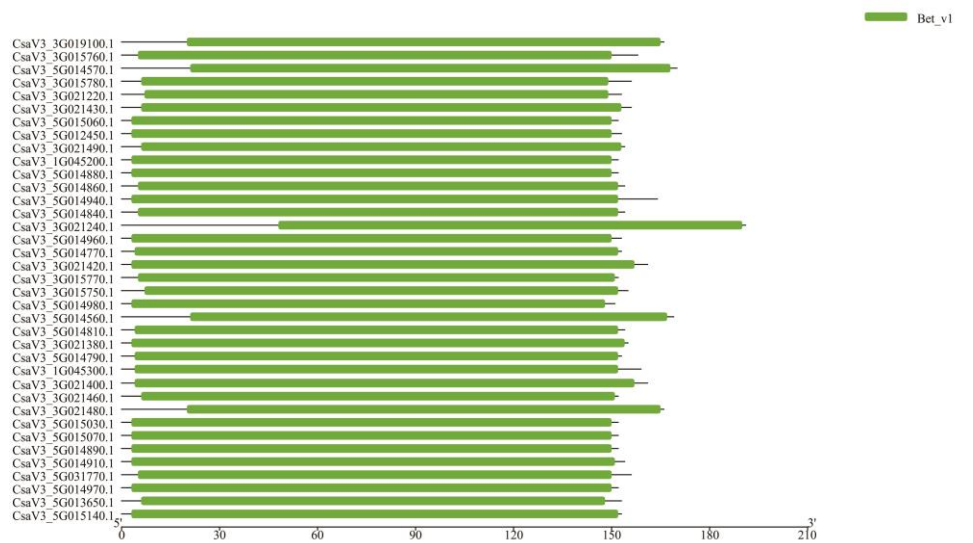

**Figure S2.** Analysis of CsMLP domain. All 37 CsMLP proteins contain one Bet v1 domain.

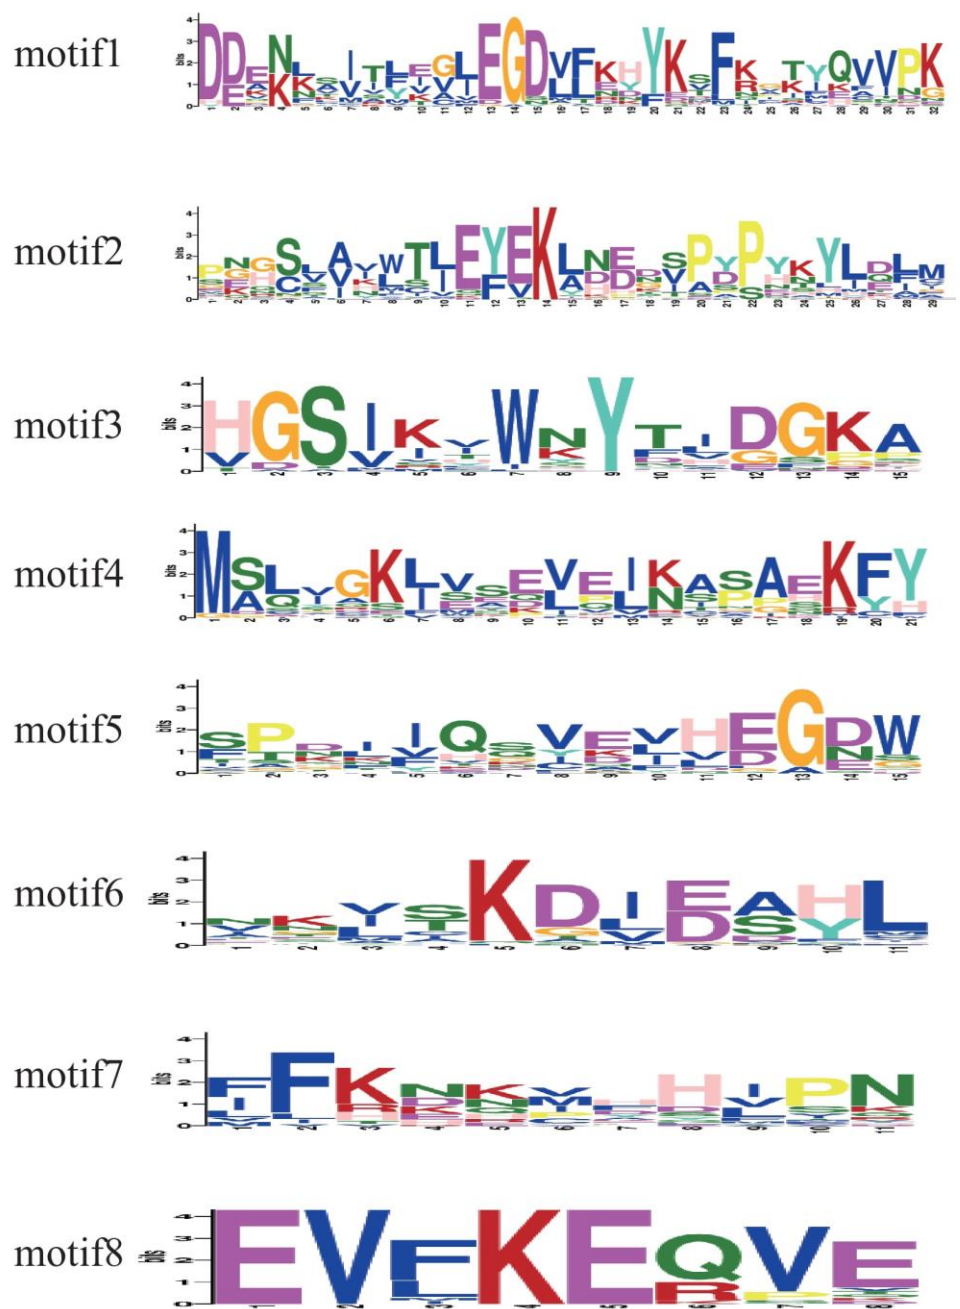

**Figure S3.** The pattern identification of eight conservative sequences.

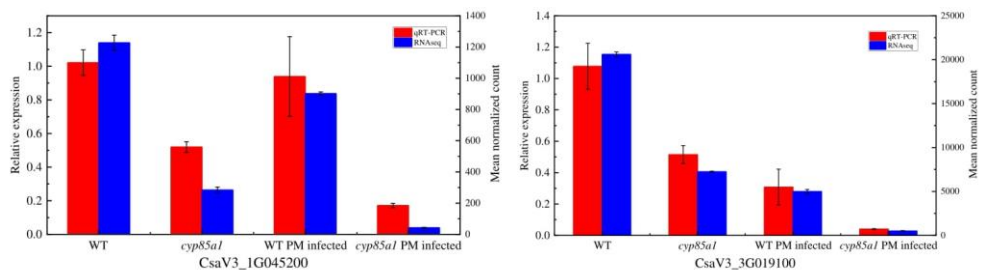

**Figure S4.** Validation of RNA-seq gene expression of *CsMLP1* and *CsMLP5* using quantitative real-time PCR (qRT-PCR).

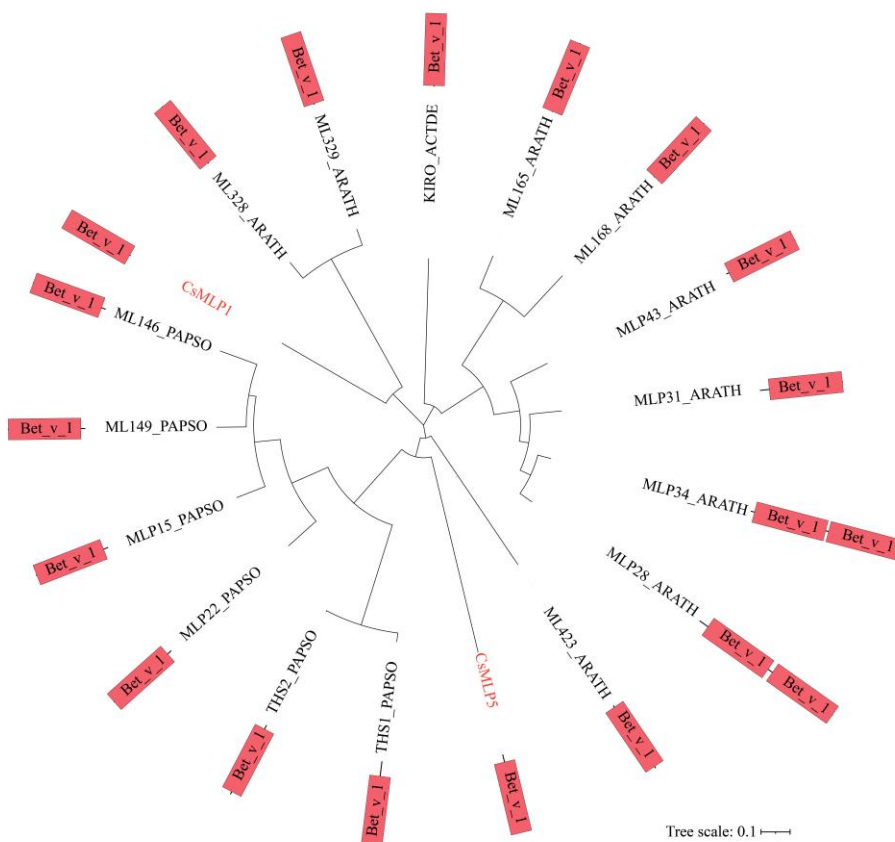

**Figure S5.** Alignment of *CsMLP1* (CsaV3\_1G045200) and *CsMLP5* (CsaV3\_3G019100) to MLP protein sequences from all reviewed plants on UniProtKB/Swiss-Prot database. The conserved motifs are represented by rectangles.

**Table S1.** List of primers used in this study.

| Analysis                                | Primer Name              | Sequence (5'-3')                               |
|-----------------------------------------|--------------------------|------------------------------------------------|
| Sequencing of the cDNA of <i>CsMLP5</i> | CsMLP5-F                 | ATGGACATGAAGAATGAGCAAG                         |
|                                         | CsMLP5-R                 | GTTGTTGCAAAGGTAATCATCAAG                       |
| Sequencing of the cDNA of <i>CsMLP1</i> | CsMLP1-F                 | ATGTCTCTAGTTGGGAAACTTG                         |
|                                         | CsMLP1-R                 | TTTAACATGCGATGCAACGT                           |
| qRT-PCR for <i>CsMLP5</i>               | RT-CsMLP5-F              | TGGACATGAAGAATGAGCAAGATTTGA                    |
|                                         | RT-CsMLP5-R              | TGAAAAAGTCGTAGAATTTGTGGGCAG                    |
| qRT-PCR for <i>CsMLP1</i>               | RT-CsMLP1-F              | GTTGTTGGAGGAGATTGGAACAGCC                      |
|                                         | RT-CsMLP1-R              | TCCAATCCAGTTAGAGTGGTTGCCA                      |
| pCAMBIA1300 vector for <i>CsMLP1</i>    | pCAMBIA1300-GFP-CsMLP1-F | gagaacacgggggacaagcttATGTCTCTAGTTGGGAAA<br>CT  |
|                                         | pCAMBIA1300-GFP-CsMLP1-R | accggtttcttagaggtaccTTTAACATGCGATGCAACG<br>T   |
| pCAMBIA1300 vector for <i>CsMLP5</i>    | pCAMBIA1300-GFP-CsMLP1-F | gagaacacgggggacaagcttATGGACATGAAGAATGA<br>GCA  |
|                                         | pCAMBIA1300-GFP-CsMLP1-R | accggtttcttagaggtaccGTTGTTGCAAAGGTAATCA<br>TC  |
| CsMLP5-silencing vector                 | pV190-CsMLP5-F           | aggactttacttaatggatccAGGACTTTACTTAATGGATC<br>C |

|                                 |                |                                                  |
|---------------------------------|----------------|--------------------------------------------------|
| CsMLP1-silencing<br>vector      | pV190-CsMLP5-R | ctagacctataactggatccCCTAGACCTATAACTGGATC<br>C    |
|                                 | pV190-CsMLP1-F | aggactttacttaatggatccAGGACTTTACTTAATGGATC<br>C   |
|                                 | pV190-CsMLP1-R | ctagacctataactggatccCCTAGACCTATAACTGGATC<br>C    |
| CsMLP5-overexpression<br>vector | Luc-CsMLP5-F   | ggggactgctctagaggatccATGGACATGAAGAATGAG<br>CAAG  |
|                                 | Luc-CsMLP5-R   | tttggcgtcttcataagcttGTTGTTGCAAAGGTAATCAT<br>CAAG |
| CsMLP1-overexpression<br>vector | Luc-CsMLP1-F   | ggggactgctctagaggatccATGTCTCTAGTTGGGAAA<br>CTTG  |
|                                 | Luc-CsMLP1-R   | tttggcgtcttcataagcttTTTAACATGCGATGCAACGT         |
| Fungal biomass quantification   | Pm1/Pm2-F      | ACTGGATCATGAGCCCACC                              |
|                                 | Pm1/Pm2-R      | GGTTCACCAGCCCATACCA                              |
|                                 | Csa-UBI-F      | CACCAAGCCCAAGAAGATC                              |
|                                 | Csa-UBI-R      | TAAACCTAATCACCACCAGC                             |

Lower cases in the sequences, ARMS primer sequence of the construct.
